# Supplementary material
Source: publisher figshare collection journal article supplement (https://acs.figshare.com/ndownloader/files/3906925)

Figure S2

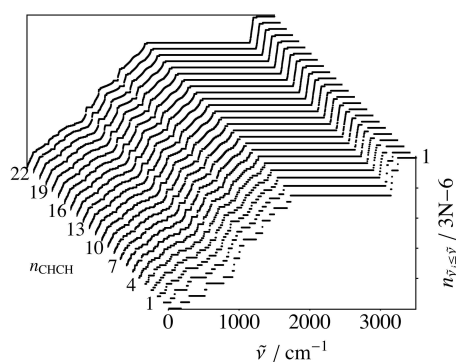

**a)** MFDs of *all cis*-Polyenes from  $C_4$  to  $C_{50}$   
B3LYP/6-31G(d)

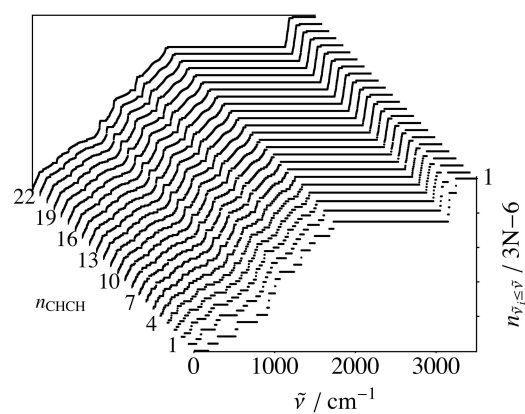

**a)** MFDs of *all cis*-Polyenes from  $C_4$  to  $C_{50}$   
B3LYP/6-311G(d,p)

Supplement: Supplementary file 1 [file 3906925]
